# Supplementary material
Source: Research Square preprint supplement (doi:10.21203/rs.3.rs-8826174/v1)
Supplement: Supplementary file 1 [file 6d1553832449560cbb4c5464.docx]

**Supplement 1: RiR Evaluation Interview Guide**

***Primary objectives***

***Fidelity:*** *To what extent was it implemented as intended, according to the RiR theory of change (TOC)*

***Appropriateness:*** *To what extent was it appropriate for the settings from the perspectives of the organisation and the RiR*

***Acceptability****: To what extent was it acceptable to organisations and the RiR*

***Feasibility:*** *To what extent was the RiR program successfully carried out within the organisation, from the perspectives of the organisation and the RiR*

***Secondary objectives***

***Early impact/Preliminary effectiveness:*** *Anecdotal evidence of perceived preliminary effectiveness of the RiR model in the organisation (e.g. TOC outcomes)*

***Underpinning frameworks***

1. Shepherd HL, Geerligs L, Butow P, Masya L, Shaw J, Price M, et al. The Elusive Search for Success: Defining and Measuring Implementation Outcomes in a Real-World Hospital Trial. Frontiers in Public Health. 2019;7.

2. Proctor E, Silmere H, Raghavan R, Hovmand P, Aarons G, Bunger A, et al. Outcomes for implementation research: conceptual distinctions, measurement challenges, and research agenda. Adm Policy Ment Health. 2011;38(2):65-76.

|  | **Questions for leaders and practitioners in RiR organisations** | **Questions for RiRs** |
| --- | --- | --- |
| **Scene setting**   - *Your role* - *Your relationship to the RiR* - *Your frequency of work with the RiR* | - What is your role in the organisation? - How do you or did you work with the RIR, i.e. Manager, Peer - How long have you worked/did you work with the RiR? - How often do/did you work with them? | About you   - How long have you been in the role? - What kind of organisation have you been embedded in? - What has been the focus of your RiR work?   About the other RIRs   - What has been your relationship with the other RiRs? - How frequently do you work with the other RiRs? - Can you comment on your experience working in the team of RiRs? |
| **Fidelity**  *The degree to which an intervention was implemented as it was prescribed in the original protocol or as it was intended by the program developers.*  **Acceptability**  *The perception among stakeholders that the RiR program is agreeable, palatable, or satisfactory.*  *Confidence, commitment, motivation, credibility, evidence, perceived importance and alignment with organisational goals.* | - What has the RiR been doing with your organisation? Is this different than what you anticipated/intended? [Prompt TOC, e.g. knowledge mobilisation, knowledge generation and learning health systems] - What challenge/issue/opportunity did you engage the RIR model for? - How well suited was the RiR model for the challenge/issue/opportunity you engaged CCCH/MCRI to help you with? - What progress has been made against this challenge/issue/opportunity? - Would you engage a RiR again? If so, why? If not, why not? - If yes, would it function in the same way or differently? Why? | - What have you been doing with your organisation? Is this different than what you expected? [Prompt TOC, e.g. knowledge mobilisation, knowledge generation and learning health systems] - What challenge/issue/opportunity were you engaged for? - How well suited was the RiR model for the challenge/issue/opportunity you were engaged for? - What progress do you feel has been made against this challenge/issue/opportunity? - Would you continue working with the organisation in this role if it was an option? If so, why? If not, why not? - Would you work in the RiR role again? If yes, would it function in the same way or differently? Why? If not, why not? |
| **Appropriateness**  *The perceived fit, relevance, or compatibility of the RiR program for the setting, and/or perceived fit of the program to address the particular issue or problem.*  *At the individual RiRs level (skill set): background knowledge of the area of work, prior experience, organisational fit, confidence, commitment, motivation.*  *At the organisational level: Alignment to mission or values of the organisation* | Individual level   - Does the RiR (as an individual) work effectively with your organisation? If so, what factors enabled them to do so? If not,   what factors have been barriers to the effective work of the RiR?   - What attributes of the RiR have enabled them to contribute/be influential/be helpful? Were there attributes of the RiR that reduced their influence? - How did the RiR make those contributions? (Prompts: what activities did they undertake)   Organisational level   - Was the RiR model aligned with the **mission or values** of your organisation? - Did the meetings that were organised as a part of the RiR model, i.e. the Reference group, meet your expectation or needs? If so, how? If not, why not? | Individual level   - What factors enabled your work as an RiR? - Did you experience barriers to work effectively as a RiR? What were these? - Was your skill set well suited to the work of an RiR? - Did you feel like you had relevant background experience and knowledge to work effectively as a RiR? - Was there anything you wish you had known prior to working as an RiR?   Organisational level   - How well do you think you the RiR model was aligned with the **mission or values** of the organisation you were working in? |
| **Feasibility**  *The extent to which the RiR program can be successfully carried out within the organisation and by the organisation.* | - How **compatible** was the RiR model with your organisation? - Prompts:   - - Was the X year period long enough to achieve change?     - Was the RiR working X FTE enough to achieve change? - How ready do you think your organisation was to have an RiR working with you? - Was it possible for your staff to engage with the RiR? Were there any barriers to the RiR successfully engaging with staff? | - How **compatible** do you think the RiR model was in the organisation/s you were working with? - Prompts: - Do you think the time period you have/had with the organisation is/was long enough to achieve/affect change? - Did the FTE you had with the organisation enough to achieve change? - How ready do you think the organisation was to have an RiR working with them? - Was it possible for staff to engage with you in your role? Were there any barriers to engagement? |
| **Early impact/Preliminary effectiveness** | - How has your organisation’s relationship with the RiR evolved over time? - What do you think has been the most significant contribution of the RiR to your organisation so far? [Prompt: Any other contributions you wish to mention?] - How did they make that contribution? What was key to them affecting this change? Specifically:   - Are you using evidence more in your work?   - Have you created new evidence?   - Do you have any new processes around learning/using data to improve the supports/services you offer children & families? | - How has your relationship with the organisation evolved over time? - Do you think you have been able to make a significant contribution to the organisation/s you have been working with? If so how, If not, why? - How did you make that contribution? What was key to you affecting this change? Specifically:   - Using evidence more?   - Creating new evidence?   - Developing or embedding new processes around learning/using data to improve the services/supports offered to children & families? |
